# Supplementary material for: Ultrasound-enhanced delivery of Morpholino with Bubble liposomes ameliorates the myotonia of myotonic dystrophy model mice
Source: PubMed Central journal article supplement — Sci Rep. 2013 Jul 22;3:2242. doi: 10.1038/srep02242 (PMC3718203; doi:10.1038/srep02242), 2013-07-22
Supplement: srep02242-s1.pdf [file srep02242-s1.pdf]

## **Supplementary Information**

### **Ultrasound-enhanced delivery of Morpholino with Bubble liposomes ameliorates the myotonia of myotonic dystrophy model mice**

Michinori Koebis, Tamami Kiyatake, Hiroshi Yamaura, Kanako Nagano, Mana Higashihara, Masahiro Sonoo, Yukiko Hayashi, Yoichi Negishi, Yoko Endo-Takahashi, Yukihiko Aramaki, Dai Yanagihara, Ryoichi Matsuda, Masanori P Takahashi, Ichizo Nishino, Shoichi Ishiura

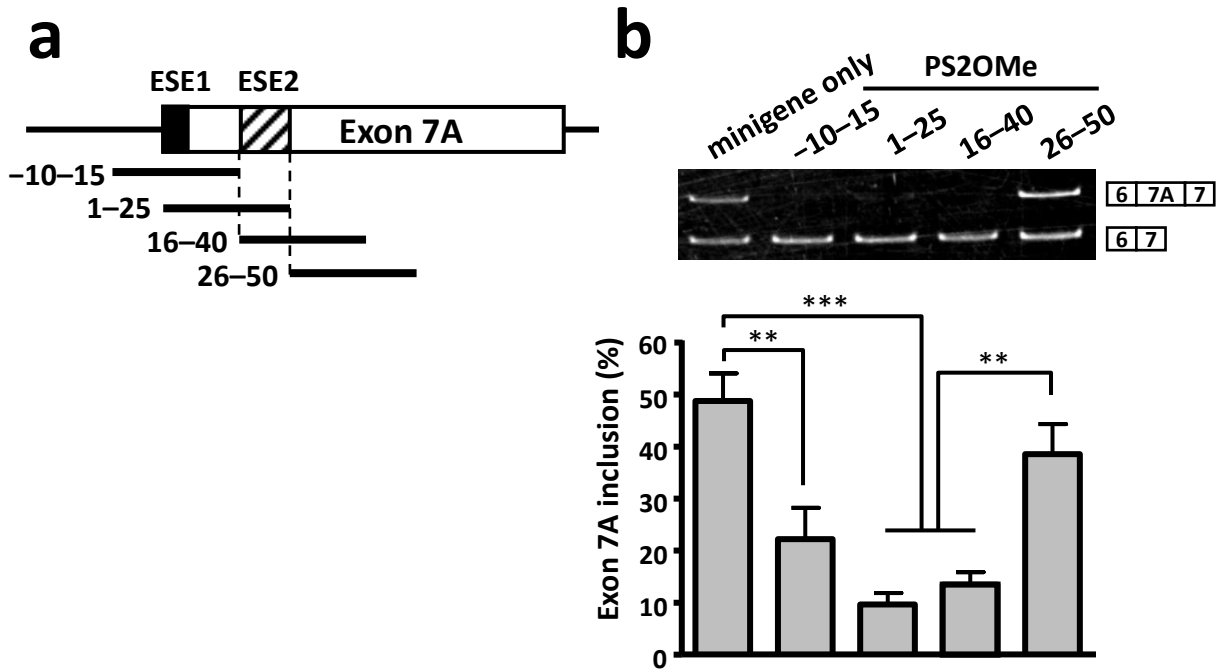

**Supplementary Fig. S1 | Putative ESE in *Clcn1* exon 7A revealed by the cellular splicing assay.** **a**, Schematic diagram of the genomic region around *Clcn1* exon 7A. We previously showed that an ESE (ESE1) is located at the beginning of exon 7A<sup>27</sup>. **b**, Cellular splicing assay. 16-40, which did not cover ESE1, prevented the inclusion of exon 7A ( $n = 3$ ). Statistical significance was analysed by Tukey's multiple comparison test (\*\*  $P < 0.01$ , \*\*\*  $P < 0.001$ ).

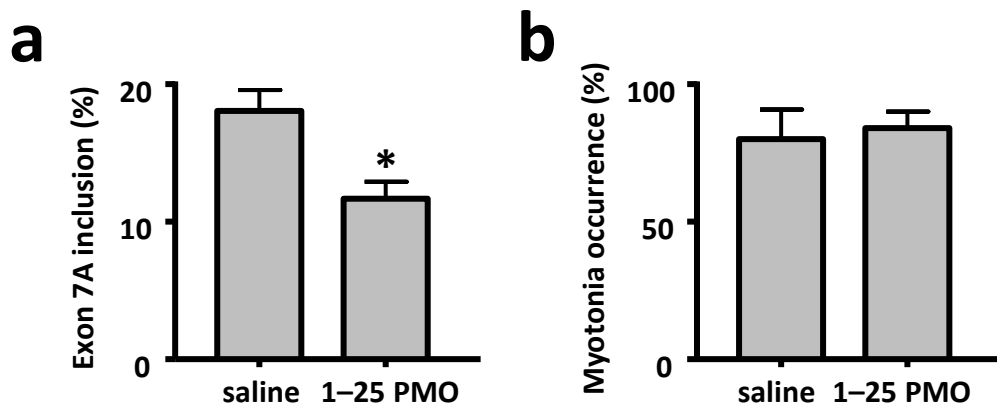

**Supplementary Fig. S2 | Intramuscular administration of 1–25 PMO without Bubble liposomes and ultrasound improved *Clcn1* splicing but not myotonia.** We administrated 60  $\mu\text{g}$  of +1–25 PMO in 50  $\mu\text{l}$  of saline intramuscularly into the TA muscles of *HSA*<sup>LR</sup> mice four times at weekly intervals. **a**, The alternative splicing of *Clcn1* exon 7A ( $n = 5$ ; Student's *t*-test; \*,  $P < 0.05$ ). **b**, The rate of occurrence of myotonia, as determined by needle electrode insertion.

## Supplementary Table ST1 | Sequences of oligonucleotides

|                 |         | sequence (5' to 3')        |
|-----------------|---------|----------------------------|
| 2' O-Methyl RNA | -10-15  | CUGCCCAGGCACGGUCUGCAACAGA  |
|                 | +1-25   | GGAGAUCAAGCUGCCCAGGCACGGU  |
|                 | +16-40  | CACAGGCUGGCACCCAGGAGAUCAAG |
|                 | +26-50  | ACGCCACUGCACAGGCUGGCACCA   |
|                 | +51-75  | AUCAGGGGCUGCAAAGUAGCAUCCC  |
|                 | +76-90  | UAGGGAGGAAGUGAAACUUGCCUCC  |
|                 | Control | AGACAACGUCUGGCACGGACCCGUC  |
| Morpholino      | -11-14  | CCAGGCACGGTCTGCAACAGAGAAG  |
|                 | +1-25   | GGAGATCAAGCTGCCCAGGCACGGT  |
|                 | Control | TGGCACGGACCCGTGGAAGTAGAGG  |

## Supplementary Table ST2 | Sequences of primers

|        | target         |    | sequence (5' to 3')      |
|--------|----------------|----|--------------------------|
| Primer | Clcn1 minigene | Fw | AAGTCCGGACTCAGATCTCG     |
|        |                | Rv | CATCTCCATCTCCAGCTCCT     |
|        | Clcn1          | Fw | GTCCTCAGCAAGTTTATGTCC    |
|        |                | Rv | GAATCCTCGCCAGTAATTCC     |
|        | Cypher         | Fw | GGAAGATGAGGCTGATGAGTGG   |
|        |                | Rv | TGCTGACAGTGGTAGTGCTCTTTC |
|        | Mbnl1          | Fw | GCTGCCCAATACCAGGTCAAC    |
|        |                | Rv | TGGTGGGAGAAATGCTGTATGC   |
|        | Ryr1           | Fw | GACAATAAGAGCAAAATGGC     |
|        |                | Rv | CTTGGTGCGTTCCTGATCTG     |
|        | Serca1         | Fw | GCTCATGGTCCTCAAGATCTCAC  |
|        |                | Rv | GGGTCAGTGCCTCAGCTTTG     |
